# Supplementary material for: Effects of Fhb1, Fhb2 and Fhb5 on Fusarium Head Blight Resistance and the Development of Promising Lines in Winter Wheat
Source: MDPI journal article supplement (doi:10.3390/ijms232315047), 2022-11-30
Supplement: s1 [file s1]

**Supplementary Table S2** Analysis of variance for number of diseased spikelets and disease severity in the DH lines at multiple tests.

| Source                | Degree of freedom | Number of diseased spikelets |                 |                 | Disease severity |                 |                 |
|-----------------------|-------------------|------------------------------|-----------------|-----------------|------------------|-----------------|-----------------|
|                       |                   | Mean square                  | <i>F</i> -value | <i>P</i> -value | Mean square      | <i>F</i> -value | <i>P</i> -value |
| Test (T) <sup>a</sup> | 4                 | 5652.1                       | 973.5           | <0.001          | 139971.8         | 1059.4          | <0.001          |
| Block (Test)          | 5                 | 96.2                         |                 |                 | 2316.6           |                 |                 |
| Genotype (G)          | 216               | 125.3                        | 21.6            | <0.001          | 2849.4           | 21.6            | <0.001          |
| T × E                 | 845               | 19.7                         | 3.4             | <0.001          | 460.4            | 3.5             | <0.001          |
| Error                 | 1069              |                              |                 |                 |                  |                 |                 |

<sup>a</sup> Data of 2020FJ unincluded.
