# Supplementary material for: Effects of Fhb1, Fhb2 and Fhb5 on Fusarium Head Blight Resistance and the Development of Promising Lines in Winter Wheat
Source: MDPI journal article supplement (doi:10.3390/ijms232315047), 2022-11-30
Supplement: s1 [file s1]

**Supplementary Table S4** Allelic variation at the loci associated with plant height and vernalization identified in the best five double haploid (DH) lines and their parents

| Parent/Line | <i>Rht-B1</i>  | <i>Rht-D1</i>  | <i>Vrn-A1</i> | <i>Vrn-B1</i> | <i>Vrn-D1</i>  | <i>Vrn-B3</i> |
|-------------|----------------|----------------|---------------|---------------|----------------|---------------|
| Parents     |                |                |               |               |                |               |
| Zhoumai 16  | <i>Rht-B1a</i> | <i>Rht-D1b</i> | <i>vrn-A1</i> | <i>vrn-B1</i> | <i>vrn-D1</i>  | <i>vrn-B3</i> |
| Lunxuan 136 | <i>Rht-B1a</i> | <i>Rht-D1b</i> | <i>vrn-A1</i> | <i>vrn-B1</i> | <i>vrn-D1</i>  | <i>vrn-B3</i> |
| Lunxuan 6   | <i>Rht-B1a</i> | <i>Rht-D1b</i> | <i>vrn-A1</i> | <i>vrn-B1</i> | <i>vrn-D1</i>  | <i>vrn-B3</i> |
| Sumai 3     | <i>Rht-B1a</i> | <i>Rht-D1a</i> | <i>vrn-A1</i> | <i>vrn-B1</i> | <i>Vrn-D1a</i> | <i>vrn-B3</i> |
| Lines       |                |                |               |               |                |               |
| DH 112      | <i>Rht-B1a</i> | <i>Rht-D1b</i> | <i>vrn-A1</i> | <i>vrn-B1</i> | <i>vrn-D1</i>  | <i>vrn-B3</i> |
| DH 401      | <i>Rht-B1a</i> | <i>Rht-D1b</i> | <i>vrn-A1</i> | <i>vrn-B1</i> | <i>vrn-D1</i>  | <i>vrn-B3</i> |
| DH 470      | <i>Rht-B1a</i> | <i>Rht-D1b</i> | <i>vrn-A1</i> | <i>vrn-B1</i> | <i>vrn-D1</i>  | <i>vrn-B3</i> |
| DH 476      | <i>Rht-B1a</i> | <i>Rht-D1b</i> | <i>vrn-A1</i> | <i>vrn-B1</i> | <i>vrn-D1</i>  | <i>vrn-B3</i> |
| DH 487      | <i>Rht-B1a</i> | <i>Rht-D1b</i> | <i>vrn-A1</i> | <i>vrn-B1</i> | <i>vrn-D1</i>  | <i>vrn-B3</i> |
