# Supplementary material for: Effects of Fhb1, Fhb2 and Fhb5 on Fusarium Head Blight Resistance and the Development of Promising Lines in Winter Wheat
Source: MDPI journal article supplement (doi:10.3390/ijms232315047), 2022-11-30
Supplement: s1 [file s1]

**Supplementary Table S10** The primer information of all markers used in identification of genes *Fhb1*, *Fhb2* and *Fhb5*

| Gene        | Locus          | Chromosome | Primer sequence (5'-3')                                  | Fragment size (bp) | Tm (°C) | Reference              |
|-------------|----------------|------------|----------------------------------------------------------|--------------------|---------|------------------------|
| <i>Fhb1</i> | <i>TaHRC</i>   | 3B         | F: ATTCCTACTAGCCGCCTGGT<br>R: ACTGGGGCAAGCAAACATTG       | 1400               | 64      | Su et al. (2018)       |
| <i>Fhb2</i> | <i>Wmc397</i>  | 6B         | F: AGTCGTGCACCTCCATTTTG<br>R: CATTGGACATCGGAGACCTG       | 155                | 61      | Cuthbert et al. (2007) |
|             | <i>Wmc398</i>  | 6B         | F: GGAGATTGACCGAGTGGAT<br>R: CGTGAGAGCGGTTCTTTG          | 160                | 61      | Cuthbert et al. (2007) |
| <i>Fhb5</i> | <i>Gwm304</i>  | 5A         | F: AGGAAACAGAAATATCGCGG<br>R: AGGACTGTGGGGAATGAATG       | 220                | 61      | Xue et al. (2011)      |
|             | <i>Xhbg394</i> | 5A         | F: CCACAACGAAGAACTGCTTACA<br>R: AGCTAGATGCTTCCTAGAGTGGAG | 270                | 60      | Xue et al. (2011)      |
|             | <i>Wmc705</i>  | 5A         | F: GGTGGGCTCCTGTCTGTGAA<br>R: TCTTGCACCTTCCCATGCTCT      | 160                | 67      | Somers et al. (2005)   |
