# Supplementary material for: Effects of Fhb1, Fhb2 and Fhb5 on Fusarium Head Blight Resistance and the Development of Promising Lines in Winter Wheat
Source: MDPI journal article supplement (doi:10.3390/ijms232315047), 2022-11-30
Supplement: s1 [file s1]

**Supplementary Table S1** Number of double haploid (DH) lines used for the evaluation of *Fusarium* head blight (FHB) resistance at six tests

| Genotype            | Number of DH lines |        |        |        |        |        |
|---------------------|--------------------|--------|--------|--------|--------|--------|
|                     | 2020FJ             | 2021HN | 2021BJ | 2021GH | 2022HN | 2022GH |
| None                | 10                 | 30     | 30     | 30     | 30     | 30     |
| <i>Fhb1</i>         | 10                 | 30     | 30     | 30     | 30     | 30     |
| <i>Fhb2</i>         | 10                 | 30     | 30     | 30     | 30     | 30     |
| <i>Fhb5</i>         | 10                 | 30     | 30     | 30     | 30     | 30     |
| <i>Fhb1</i> + 2     | 10                 | 30     | 30     | 30     | 30     | 30     |
| <i>Fhb1</i> + 5     | 10                 | 26     | 26     | 26     | 26     | 26     |
| <i>Fhb2</i> + 5     | 10                 | 30     | 30     | 30     | 30     | 30     |
| <i>Fhb1</i> + 2 + 5 | 6                  | 11     | 11     | 11     | 11     | 11     |
