# Supplementary material for: Effects of Fhb1, Fhb2 and Fhb5 on Fusarium Head Blight Resistance and the Development of Promising Lines in Winter Wheat
Source: MDPI journal article supplement (doi:10.3390/ijms232315047), 2022-11-30
Supplement: s1 [file s1]

**Supplementary Table S3** Correlation coefficients of number of diseased spikelets (bottom left) or disease severity (top right) in different tests.

| Environment <sup>a</sup> | 2021HN | 2021BJ | 2021GH | 2022HN | 2022GH |
|--------------------------|--------|--------|--------|--------|--------|
| 2021HN                   |        | 0.84** | 0.60** | 0.64** | 0.49** |
| 2021BJ                   | 0.84** |        | 0.61** | 0.59** | 0.46** |
| 2021GH                   | 0.64** | 0.64** |        | 0.46** | 0.55** |
| 2022HN                   | 0.64** | 0.59** | 0.45** |        | 0.30** |
| 2022GH                   | 0.50** | 0.46** | 0.56** | 0.29** |        |

<sup>a</sup> Data of 2020FJ uninculded. \*\*: Significant at  $P < 0.01$ .
