# Supplementary material for: Effects of Fhb1, Fhb2 and Fhb5 on Fusarium Head Blight Resistance and the Development of Promising Lines in Winter Wheat
Source: Int J Mol Sci. 2022 Nov 30;23(23):15047. doi: 10.3390/ijms232315047 (PMC9739584; doi:10.3390/ijms232315047)
Supplement: Supplementary file 1 [file ijms-23-15047-s001.zip › Table S5.xlsx]

## Sheet: Sheet1
Supplementary Table S5 The genetic contributions (%) of Zhoumai 16 (B), Lunxuan 136 (C), Lunxuan 6 (D) and Sumai 3 (E) to line DH 112 (A)
Genome/Chromosome	ABCDE	ABCD	ABCE	ABDE	ACDE	ABC	ABD	ABE	ACD	ACE	ADE	AB	AC	AD	AE	A
Genome A
1A	3.09488	0.683104	0.0189385	0.0121865	0.48532	0.0177857	0.00708136	0.00889287	1.53435	0.00214088	0.0363949	0.0418294	0.00444644	0.00609326	0.00345834	0.0722957
2A	4.28389	1.06204	0.00708136	0.173576	0.159413	0.00312897	0.325743	0.0253611	0.0634029	0.321625	0.0037877	0.0594505	0.0871172	0.0108691	0.0248671	0.0974922
3A	3.26237	0.374159	0.203383	0.00329366	0.206677	0.0999625	0.00823414	0.0212441	0.208488	0.00675199	0.00197619	0.044629	0.00279961	0.00279961	0.00279961	0.0474286
4A	4.46719	0.599775	0.00461112	0.00708136	0.140968	0.00181151	0.0629088	0.00362302	0.0197619	0.113631	0.00115278	0.0584624	0.0128453	0.00230556	0.013504	0.112972
5A	2.43138	1.27596	0.00279961	0.0298076	0.637487	0.00971628	0.0823414	0.041006	0.346493	0.0179504	0.0354068	0.0492402	0.0303016	0.00263492	0.00428175	0.0517104
6A	2.70656	0.64638	0.00181151	0.00428175	0.25427	0.000823414	0.00724604	0.00395239	0.126312	0.000823414	0.000823414	0.0475933	0.000658731	0.00148215	0.00642263	0.0484167
7A	4.04527	0.497342	0.00872819	0.156778	0.382558	0.00675199	0.190538	0.00691668	0.217875	0.164847	0.112972	0.0551687	0.0520398	0.0131746	0.0100457	0.068508
Genome B
1B	2.02181	1.6852	0.00428175	0.0151508	0.128453	0.00230556	0.221498	0.0115278	0.151838	0.0948573	0.00148215	0.0482521	0.0413354	0.00279961	0.0107044	0.0910696
2B	4.56665	1.80723	0.00329366	0.0255258	0.183786	0.00461112	0.116266	0.0599445	0.0520398	0.044135	0.00444644	0.112972	0.00675199	0.00461112	0.00675199	0.142286
3B	3.49687	3.29613	0.00790477	0.0365596	0.66433	0.00708136	0.0299723	0.0357362	0.293794	0.258058	0.144756	0.140145	0.100292	0.0444644	0.0298076	0.0770715
4B	2.01951	0.795912	0.00329366	0.00247024	0.08827	0.000988097	0.00411707	0.00296429	0.0108691	0.00164683	0.0200913	0.0334306	0.000658731	0.0164683	0.0228909	0.0596152
5B	3.00843	0	0.00345834	0.128453	0.297088	0.00230556	0.376794	0.145909	0.879571	0.0115278	0.0479227	0.220346	0.0133393	0.0750954	0.00691668	0.0675199
6B	2.63954	1.39355	0.00592858	0.00279961	0.0989744	0.0276667	0.0281608	0.00806946	0.0225615	0.00247024	0.0566509	0.0436409	0.000329366	0.00345834	0.797723	0.332165
7B	2.48243	0.959936	0.00312897	0.0133393	0.229568	0.00181151	0.0121865	0.00345834	0.114784	0.00395239	0.0976569	0.0466052	0.000164683	0	0.00922224	0.0566509
Genome D
1D	2.0895	0.541806	0.00263492	0.00181151	0.150026	0.00148215	0.0228909	0.00988097	0.106385	0.00494048	0.00230556	0.0461112	0.00197619	0.00279961	0.00279961	0.047758
2D	2.60561	0.263987	0.00312897	0.0634029	0.171599	0.00263492	0.0326072	0.1245	0.0512163	0.0111984	0.00181151	0.0774009	0.00411707	0.00296429	0.00592858	0.0602739
3D	2.02214	0.152826	0.0125159	0.0047758	0.16073	0.00312897	0.0146568	0.0393592	0.13257	0.0568156	0.00345834	0.0568156	0.0107044	0.00230556	0.00510517	0.0531925
4D	2.21136	0.108361	0.00131746	0.00214088	0.139486	0.00115278	0.00247024	0.00362302	0.0179504	0.00279961	0.000823414	0.0495695	0.00115278	0.000823414	0.00164683	0.0383711
5D	2.84094	1.70068	0.00197619	0.0144921	0.225121	0.000658731	0.0681787	0.00905755	0.0436409	0.00444644	0.00296429	0.0703196	0.00181151	0.0047758	0.0037877	0.061756
6D	2.30408	0.308616	0.00411707	0.00428175	0.121701	0.00609326	0.0181151	0.0222322	0.0250318	0.00230556	0.00279961	0.0864585	0.00115278	0.00510517	0.0116925	0.0568156
7D	3.08681	0.487296	0.00395239	0.0352421	0.217546	0.00197619	0.0571449	0.0047758	0.0316191	0.023879	0.00938692	0.085141	0.0419941	0.00181151	0.00312897	0.084647
Total	61.6872	18.6403	0.308286	0.73745	5.14337	0.203877	1.68915	0.592035	4.45055	1.1508	0.58907	1.47358	0.415989	0.206842	0.983486	1.72802
