# Supplementary material for: Effects of Fhb1, Fhb2 and Fhb5 on Fusarium Head Blight Resistance and the Development of Promising Lines in Winter Wheat
Source: Int J Mol Sci. 2022 Nov 30;23(23):15047. doi: 10.3390/ijms232315047 (PMC9739584; doi:10.3390/ijms232315047)
Supplement: Supplementary file 1 [file ijms-23-15047-s001.zip › Table S6.xlsx]

## Sheet: Sheet1
Supplementary Table S6 The genetic contributions (%) of Zhoumai 16 (B), Lunxuan 136 (C), Lunxuan 6 (D) and Sumai 3 (E) to line DH 401 (A)
Genome/Chromosome	ABCDE	ABCD	ABCE	ABDE	ACDE	ABC	ABD	ABE	ACD	ACE	ADE	AB	AC	AD	AE	A
Genome A
1A	3.10782	0.670912	0.00348224	0.0127682	0.481378	0.00116075	0.00679866	0.917819	0.658641	0.00298478	0.0528969	0.0480881	0.00298478	0.0195669	0.0187378	0.0668259
2A	4.31068	0.974364	0.00762777	0.102643	0.161012	0.00298478	0.336782	0.0326667	0.0582032	0.30196	0.0031506	0.062017	0.162173	0.0104467	0.122044	0.0815839
3A	3.27198	0.345903	0.192187	0.00331642	0.193679	0.111598	0.0031506	0.128511	0.106623	0.0071303	0.00165821	0.0591981	0.00265314	0.00232149	0.0301794	0.0475906
4A	4.56422	0.629456	0.00364806	0.0165821	0.144596	0.00165821	0.150897	0.00696448	0.0195669	0.0187378	0.00132657	0.0573741	0.00298478	0.00696448	0.00431135	0.05555
5A	2.42546	1.27533	0.00281896	0.0261997	0.249561	0.0104467	0.0782675	0.105628	0.288363	0.0132657	0.0354857	0.43528	0.0348224	0.00265314	0.00679866	0.0591981
6A	2.71399	0.647033	0.00198985	0.00464299	0.252048	0.000829105	0.0071303	0.00613538	0.126024	0.000497463	0.000829105	0.0494147	0.000331642	0.00132657	0.0071303	0.0477564
7A	4.05349	0.480218	0.00862269	0.149405	0.387192	0.00845687	0.163002	0.0230491	0.204457	0.187875	0.113422	0.0535602	0.0535602	0.0149239	0.0225517	0.064836
Genome B
1B	2.02617	1.67031	0.00182403	0.0540576	0.105296	0.00182403	0.316718	0.0600272	0.103804	0.00132657	0.00149239	0.0771068	0	0.00530627	0.0290187	0.0918648
2B	4.65542	1.80728	0.00514045	0.0127682	0.186051	0.00878851	0.0908699	0.0431135	0.0746194	0.0580373	0.00132657	0.109773	0.0172454	0.00265314	0.0106125	0.0727954
3B	3.50429	3.11992	0.00795941	0.0336617	0.673233	0.00696448	0.0323351	0.0182403	0.295161	0.317381	0.145259	0.0616854	0.134812	0.0474248	0.202799	0.0812523
4B	2.05237	0.802574	0.0421185	0.00232149	0.0892117	0.0223858	0.00298478	0.00530627	0.00978344	0.00198985	0.000331642	0.0334958	0.000497463	0.000994926	0.0144264	0.031506
5B	3.00584	1.32657	0.0112758	0.0980002	0.266474	0.0553842	0.351209	0.714523	0.228833	0.0857294	0.00215567	0.193513	0.126687	0.00613538	0.123868	0.0737903
6B	2.61533	0.937386	0.00480881	0.00281896	0.0999901	0.0145922	0.0271946	0.0127682	0.0179087	0.00547209	0.0683182	0.0441084	0.000165821	0.0779359	1.19922	0.401784
7B	2.47587	0.93208	0.00364806	0.0114416	0.187046	0.0956787	0.00978344	0.0558817	0.0623487	0.0039797	0.0109442	0.0862269	0.00132657	0.00165821	0.0301794	0.0587006
Genome D
1D	2.09813	0.497795	0.00182403	0.00364806	0.147415	0.000829105	0.0122708	0.0457666	0.0764435	0.0117733	0.00265314	0.0467615	0.000497463	0.00348224	0.0528969	0.0480881
2D	2.62163	0.255033	0.00265314	0.0610221	0.174775	0.00198985	0.028687	0.12818	0.0500779	0.0106125	0.00232149	0.074122	0.00348224	0.00298478	0.0174112	0.0590323
3D	2.03098	0.150068	0.00563791	0.0071303	0.168806	0.00298478	0.0533944	0.0761118	0.111598	0.00762777	0.00447717	0.0514045	0.00381388	0.00895433	0.00895433	0.0522336
4D	2.14755	0.0545551	0.00198985	0.00248731	0.137631	0.000829105	0.00281896	0.00514045	0.0169137	0.00281896	0.000497463	0.0484197	0.000829105	0.000165821	0.0522336	0.112924
5D	2.84731	0.237621	0.00215567	0.0116075	0.159188	0.00232149	0.0664942	0.0184061	0.0329984	0.00248731	0.00165821	0.133652	0.00480881	0.00447717	0.0217225	0.0645044
6D	2.3147	0.306271	0.00431135	0.00381388	0.122044	0.00646702	0.0117733	0.0165821	0.037973	0.00132657	0.00298478	0.0862269	0.000829105	0.00480881	0.0154214	0.0598614
7D	2.82095	0.438762	0.00414552	0.0149239	0.225019	0.00348224	0.0114416	0.00912015	0.0278579	0.0638411	0.00646702	0.0739562	0.0587006	0.00198985	0.0094518	0.121878
Total	61.6642	17.5594	0.319869	0.63526	4.61165	0.361656	1.764	2.42994	2.6082	1.10686	0.459656	1.88538	0.613206	0.227175	1.99997	1.75356
