# Supplementary material for: Effects of Fhb1, Fhb2 and Fhb5 on Fusarium Head Blight Resistance and the Development of Promising Lines in Winter Wheat
Source: Int J Mol Sci. 2022 Nov 30;23(23):15047. doi: 10.3390/ijms232315047 (PMC9739584; doi:10.3390/ijms232315047)
Supplement: Supplementary file 1 [file ijms-23-15047-s001.zip › Table S7.xlsx]

## Sheet: Sheet1
Supplementary Table S7 The genetic contributions (%) of Zhoumai 16 (B), Lunxuan 136 (C), Lunxuan 6 (D) and Sumai 3 (E) to line DH 470 (A)
Genome/Chromosome	ABCDE	ABCD	ABCE	ABDE	ACDE	ABC	ABD	ABE	ACD	ACE	ADE	AB	AC	AD	AE	A
Genome A
1A	3.09548	0.681357	0.00263263	0.00230355	0.482922	0.00131631	0.00608795	0.00872058	1.5238	0.0128341	0.0432738	0.0416284	0.0159603	0.021061	0.00148085	0.0720682
2A	4.29283	1.0412	0.00707518	0.156312	0.193004	0.00246809	0.354746	0.0289589	0.063183	0.282843	0.0037844	0.0630185	0.077498	0.0113532	0.041793	0.0936228
3A	3.25969	0.373668	0.196953	0.00279717	0.204851	0.106292	0.00296171	0.0153021	0.216369	0.00723972	0.00164539	0.0444256	0.00312624	0.00263263	0.00213901	0.0468937
4A	4.54457	0.501022	0.00526525	0.0139858	0.139858	0.00148085	0.0225419	0.00773334	0.018922	0.154173	0.00131631	0.0658157	0.00148085	0.000987235	0.127353	0.0533107
5A	2.43041	1.27189	0.00279717	0.0200738	0.641703	0.00164539	0.0539688	0.0105305	0.381566	0.044261	0.0294525	0.0472227	0.0363632	0.00197447	0.0126695	0.0549561
6A	2.70321	0.651246	0.00197447	0.00279717	0.2552	0.000822696	0.00707518	0.00361986	0.128341	0.00131631	0.000493618	0.0472227	0.000822696	0.00131631	0.0037844	0.0473873
7A	4.03911	0.496415	0.00872058	0.010695	0.382389	0.0102014	0.140516	0.00723972	0.216369	0.233152	0.0908256	0.0654866	0.182474	0.0118468	0.00394894	0.0689419
Genome B
1B	2.02284	1.67994	0.00213901	0.014644	0.122088	0.00213901	0.290247	0.0176057	0.14644	0.0289589	0.000987235	0.0585759	0.0394894	0.00526525	0.0100369	0.0893448
2B	4.64362	1.80779	0.00361986	0.027478	0.189385	0.00855604	0.14463	0.0434383	0.0750299	0.00296171	0.00164539	0.111558	0.00180993	0.00444256	0.0046071	0.0702582
3B	3.49185	3.29687	0.00740426	0.0307688	0.67132	0.00806242	0.0279717	0.0370213	0.293538	0.270009	0.120772	0.138377	0.116987	0.0475518	0.0208965	0.0758526
4B	2.04769	0.810685	0.00329078	0.00197447	0.0880285	0.00131631	0.00411348	0.00411348	0.0100369	0.00394894	0.0174412	0.0330724	0.000822696	0.0403121	0.00345532	0.0317561
5B	3.00481	0.899042	0.0121759	0.104153	0.339773	0.00263263	0.330724	0.963541	0.0644994	0.054627	0.0424511	0.195308	0.0166185	0.00625249	0.513033	0.0679547
6B	2.65221	2.52502	0.00542979	0.00312624	0.0960909	0.0161248	0.0283007	0.00740426	0.0283007	0.0156312	0.0580823	0.0427802	0.000164539	0.0779916	0.00312624	0.0561079
7B	2.48191	0.959263	0.00411348	0.00180993	0.22838	0.105634	0.00740426	0.00526525	0.114684	0.00789788	0.00230355	0.0472227	0.00937873	0.00148085	0.00279717	0.0552852
Genome D
1D	2.09113	0.539853	0.00180993	0.00197447	0.149731	0.000822696	0.00937873	0.0143149	0.105963	0.0153021	0.00197447	0.0445901	0.00213901	0.00361986	0.00131631	0.0472227
2D	2.60498	0.262934	0.00246809	0.0552852	0.181651	0.00197447	0.031427	0.127189	0.0510071	0.00921419	0.00197447	0.0760171	0.00180993	0.00361986	0.00658157	0.058905
3D	2.02038	0.153021	0.00608795	0.00641703	0.167994	0.00180993	0.0549561	0.0131631	0.156806	0.00822696	0.0046071	0.0513362	0.0157958	0.00937873	0.00411348	0.0542979
4D	2.21042	0.108431	0.00131631	0.00246809	0.138707	0.00131631	0.00197447	0.00164539	0.0187575	0.0037844	0.000493618	0.0478809	0.00213901	0.000822696	0.00230355	0.0366922
5D	2.83879	0.244505	0.00148085	0.0116823	0.227393	0.000822696	0.0643348	0.0177702	0.033566	0.00575887	0.00279717	0.0668029	0.00246809	0.00477164	0.00987235	0.0612086
6D	2.30552	0.324965	0.00411348	0.00345532	0.120936	0.00625249	0.0115177	0.0143149	0.0401476	0.00230355	0.00180993	0.0849022	0.00115177	0.00477164	0.00115177	0.0552852
7D	3.0884	0.47486	0.00575887	0.0373504	0.224267	0.0046071	0.00872058	0.00625249	0.0330724	0.0707518	0.00674611	0.0852313	0.0304397	0.000658157	0.010366	0.0830923
Total	61.8699	19.104	0.286627	0.511552	5.24567	0.286298	1.6036	1.35514	3.7204	1.2352	0.434877	1.45848	0.55894	0.262111	0.786826	1.28044
