# Supplementary material for: Effects of Fhb1, Fhb2 and Fhb5 on Fusarium Head Blight Resistance and the Development of Promising Lines in Winter Wheat
Source: Int J Mol Sci. 2022 Nov 30;23(23):15047. doi: 10.3390/ijms232315047 (PMC9739584; doi:10.3390/ijms232315047)
Supplement: Supplementary file 1 [file ijms-23-15047-s001.zip › Table S8.xlsx]

## Sheet: Sheet1
Supplementary Table S8 The genetic contributions (%) of Zhoumai 16 (B), Lunxuan 136 (C), Lunxuan 6 (D) and Sumai 3 (E) to line DH 476 (A)
	ABCDE	ABCD	ABCE	ABDE	ACDE	ABC	ABD	ABE	ACD	ACE	ADE	AB	AC	AD	AE	A
Genome A
1A	3.08714	0.658896	0.0386905	0.0102513	0.260747	0.0532407	0.00396825	0.0684524	0.758763	0.00496032	0.209987	0.051422	0.0209987	0.690642	0.020668	0.0796958
2A	4.33036	1.12798	0.0120701	0.11293	0.0897817	0.0181878	0.165675	0.0279431	0.0408399	0.220403	0.0687831	0.0491071	0.0818452	0.0286045	0.202216	0.123677
3A	3.2619	0.374504	0.174934	0.00297619	0.0697751	0.118882	0.00248016	0.180886	0.0428241	0.00363757	0.0400132	0.120866	0.0107474	0.0342262	0.00562169	0.0428241
4A	4.50893	0.641038	0.00380291	0.0117394	0.0901124	0.0152116	0.0770503	0.00628307	0.0132275	0.047619	0.0534061	0.0453042	0.021164	0.0102513	0.0406746	0.0800265
5A	2.04828	1.28886	0.0644841	0.0419974	0.33664	0.0241402	0.0661376	0.197255	0.0800265	0.00611772	0.289517	0.0684524	0.0150463	0.0582011	0.0138889	0.0491071
6A	2.69742	0.655754	0.00314153	0.00330688	0.154597	0.0130622	0.00529101	0.00462963	0.0643188	0.000992063	0.0972222	0.036541	0.0145503	0.0623347	0.00297619	0.0348876
7A	4.07937	0.574901	0.0124008	0.12252	0.241071	0.0173611	0.234788	0.025463	0.120536	0.0160384	0.255126	0.0424934	0.03125	0.108135	0.0231481	0.0687831
Genome B
1B	2.01885	1.74339	0.0147156	0.00992063	0.0621693	0.0190146	0.220734	0.0363757	0.0681217	0.0200066	0.0434854	0.0582011	0.0494378	0.051422	0.0223214	0.0886243
2B	4.438	1.27745	0.0193452	0.020172	0.0706019	0.0449735	0.0667989	0.0739087	0.0193452	0.123181	0.0504299	0.132937	0.0580357	0.00876323	0.455522	0.222884
3B	3.41369	3.15179	0.016369	0.0279431	0.352183	0.0520833	0.0193452	0.0411706	0.183697	0.121197	0.448909	0.154762	0.0902778	0.151455	0.228671	0.190972
4B	2.21544	0.815972	0.00380291	0.00214947	0.0626653	0.0107474	0.00281085	0.00314153	0.0137235	0.000992063	0.0446429	0.0243056	0.00975529	0.0353836	0.00214947	0.025959
5B	3.00546	1.47106	0.011078	0.0239749	0.236772	0.0152116	0.0818452	0.0300926	0.508763	0.173942	0.220403	0.0358796	0.126157	0.406581	0.152282	0.161376
6B	2.64964	2.50579	0.0292659	0.00297619	0.077381	0.0251323	0.0203373	0.0128968	0.0297619	0.00562169	0.0891204	0.0350529	0.0147156	0.0438161	0.0193452	0.0462963
7B	2.47933	0.959656	0.0026455	0.00958995	0.143519	0.0882937	0.00925926	0.00611772	0.0676257	0.0026455	0.0861442	0.0649802	0.0160384	0.0491071	0.00380291	0.0434854
Genome D
1D	2.04778	0.545966	0.00727513	0.00115741	0.0710979	0.0309193	0.0160384	0.0160384	0.062996	0.0026455	0.0342262	0.0623347	0.0203373	0.0408399	0.00363757	0.0744048
2D	2.60582	0.256118	0.036541	0.042328	0.0955688	0.0219907	0.0188492	0.0939153	0.0386905	0.011078	0.0692791	0.0634921	0.0229828	0.0128968	0.0219907	0.0603505
3D	2.01968	0.15129	0.00859788	0.00314153	0.0992063	0.0185185	0.00429894	0.0117394	0.0861442	0.0329034	0.0701058	0.0378638	0.0238095	0.078869	0.03125	0.0598545
4D	2.43767	0.109623	0.00132275	0.00297619	0.0841601	0.0150463	0.0014881	0.00446429	0.0112434	0.00115741	0.0532407	0.0357143	0.010086	0.00760582	0.00198413	0.0274471
5D	2.85582	0.266369	0.0041336	0.00925926	0.136905	0.020172	0.046627	0.0115741	0.0267857	0.00578704	0.0930886	0.0459656	0.016369	0.0168651	0.00760582	0.0479497
6D	2.29216	0.30539	0.0112434	0.0026455	0.0734127	0.0279431	0.00876323	0.0180225	0.0190146	0.00578704	0.0535714	0.0593585	0.0150463	0.016369	0.0160384	0.0545635
7D	3.09987	0.499173	0.00396825	0.0274471	0.132606	0.0299272	0.042328	0.00710979	0.0205026	0.0145503	0.0892857	0.0608466	0.0448082	0.0138889	0.014881	0.0841601
Total	61.5926	19.381	0.479828	0.491402	2.94097	0.68006	1.11491	0.87748	2.27695	0.821263	2.45999	1.28588	0.713459	1.92626	1.29067	1.66733
