# Supplementary material for: Effects of Fhb1, Fhb2 and Fhb5 on Fusarium Head Blight Resistance and the Development of Promising Lines in Winter Wheat
Source: Int J Mol Sci. 2022 Nov 30;23(23):15047. doi: 10.3390/ijms232315047 (PMC9739584; doi:10.3390/ijms232315047)
Supplement: Supplementary file 1 [file ijms-23-15047-s001.zip › Table S9.xlsx]

## Sheet: Sheet1
Supplementary Table S9 The genetic contributions (%) of Zhoumai 16 (B), Lunxuan 136 (C), Lunxuan 6 (D) and Sumai 3 (E) to line DH 487 (A)
Genome/Chromosome	ABCDE	ABCD	ABCE	ABDE	ACDE	ABC	ABD	ABE	ACD	ACE	ADE	AB	AC	AD	AE	A
Genome A
1A	3.09349	0.680291	0.0188145	0.0115527	0.48472	0.0179893	0.00429102	0.0122129	1.52942	0.00264063	0.0376289	0.0419199	0.00610645	0.00627149	0.00478613	0.0701416
2A	4.29052	1.07011	0.00478613	0.209435	0.147215	0.00247559	0.40154	0.0948975	0.050667	0.0706367	0.00478613	0.234356	0.0037959	0.0120479	0.0199697	0.0917617
3A	3.26167	0.370348	0.198872	0.0029707	0.153321	0.10546	0.00363086	0.0108926	0.221813	0.00429102	0.00165039	0.100344	0.00280566	0.00132031	0.00478613	0.0475313
4A	4.55442	0.628469	0.00429102	0.00594141	0.143089	0.00231055	0.12609	0.00363086	0.0217852	0.0450557	0.00115527	0.0566084	0.0138633	0.00627149	0.00445606	0.0554531
5A	2.43301	1.15214	0.0029707	0.0227754	0.640022	0.0434053	0.0277266	0.0117178	0.386192	0.059249	0.0037959	0.0496768	0.0343281	0.00132031	0.119323	0.0613945
6A	2.70978	0.644478	0.00198047	0.00363086	0.255481	0.000660156	0.00627149	0.0037959	0.126255	0.00115527	0.000825196	0.0481914	0.000990235	0.00132031	0.00742676	0.0473662
7A	4.04115	0.496768	0.00874707	0.04225	0.381405	0.00478613	0.134012	0.0075918	0.218017	0.215541	0.120314	0.0552881	0.165699	0.0117178	0.00396094	0.0698115
Genome B
1B	2.02586	1.68241	0.0067666	0.00214551	0.107605	0.00214551	0.0029707	0.0407647	0.117673	0.312749	0.00132031	0.0787237	0.0552881	0.000165039	0.0112227	0.0911016
2B	4.65097	1.8118	0.00561133	0.0141934	0.225113	0.00874707	0.0475313	0.0288818	0.088461	0.0945674	0.00165039	0.0712969	0.016834	0.00165039	0.00462109	0.075918
3B	3.48497	2.99893	0.0538027	0.0382891	0.170155	0.00643653	0.0231055	0.370348	0.0315225	0.0462109	0.151341	0.853252	0.00198047	0.00330078	0.292449	0.088791
4B	2.04731	0.812322	0.0029707	0.00214551	0.0894512	0.00115527	0.00280566	0.00313574	0.0110576	0.00214551	0.0206299	0.0333379	0.000660156	0.0394443	0.00264063	0.0330078
5B	3.01229	1.44211	0.0037959	0.118168	0.304827	0.0029707	0.363416	0.154147	0.884114	0.0029707	0.0495117	0.231055	0.0146885	0.0160088	0.00808692	0.0622197
6B	2.63303	0.479604	0.0354834	0.0029707	0.0986934	0.000825196	0.025416	0.0122129	0.0150186	0.00165039	0.0754229	0.0481914	0	0.0462109	1.59824	0.416559
7B	2.48466	0.959372	0.00462109	0.00264063	0.227589	0.105625	0.00742676	0.0037959	0.116022	0.00742676	0.00313574	0.0491817	0.00957227	0.00115527	0.00363086	0.054958
Genome D
1D	2.09369	0.540668	0.00346582	0.00181543	0.14936	0.00148535	0.0115527	0.0113877	0.10579	0.0117178	0.00231055	0.0495117	0.00214551	0.00231055	0.00264063	0.0472012
2D	2.61158	0.249374	0.00478613	0.0650254	0.171971	0.00198047	0.0221152	0.12477	0.0511621	0.0183193	0.00247559	0.0769082	0.00198047	0.00165039	0.0194746	0.0575986
3D	2.02107	0.145069	0.0160088	0.00775684	0.156787	0.00313574	0.054958	0.059249	0.117673	0.00478613	0.00346582	0.0737725	0.00231055	0.00165039	0.0100674	0.0529776
4D	2.21747	0.108596	0.00148535	0.00264063	0.139458	0.00165039	0.00132031	0.0037959	0.0179893	0.00280566	0.000330078	0.0498418	0.000660156	0.000825196	0.00165039	0.038124
5D	2.84511	0.25515	0.00247559	0.0143584	0.163884	0.000825196	0.0640352	0.0117178	0.0407647	0.00511621	0.00330078	0.132361	0.00165039	0.00412598	0.0037959	0.0607344
6D	2.30758	0.300041	0.00495117	0.00396094	0.126585	0.00577637	0.0102324	0.00874707	0.0434053	0.00346582	0.0029707	0.080209	0.00115527	0.00396094	0.0161738	0.0594141
7D	3.09465	0.488516	0.00528125	0.0217852	0.217687	0.00495117	0.0472012	0.00462109	0.0331729	0.0321826	0.00709668	0.0873057	0.0551231	0.00247559	0.00198047	0.0821895
Total	61.9143	17.3166	0.391968	0.596451	4.55442	0.324797	1.38765	0.982313	4.22797	0.944684	0.495117	2.50133	0.391638	0.165204	2.14138	1.66425
