# Supplementary figures and images for: Effects of Fhb1, Fhb2 and Fhb5 on Fusarium Head Blight Resistance and the Development of Promising Lines in Winter Wheat
Source: MDPI journal article supplement (doi:10.3390/ijms232315047), 2022-11-30

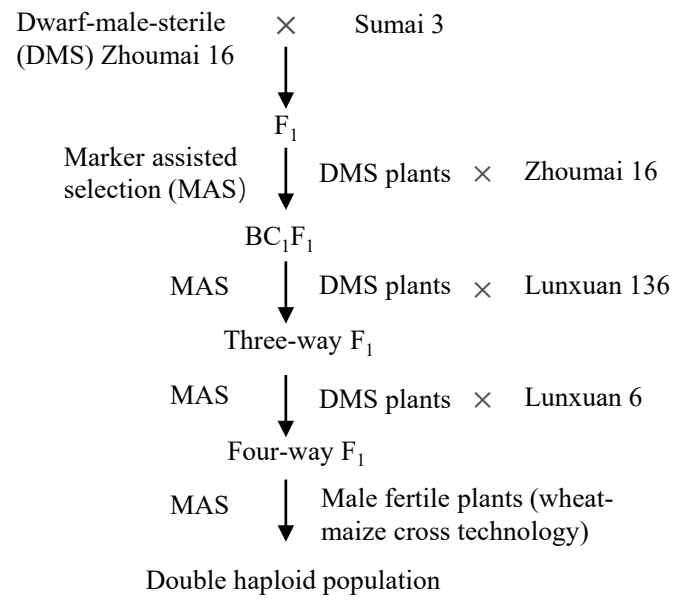

Supplement: s1 [file s1]
